# Supplementary material
Source: MDPI journal article supplement (https://www.mdpi.com/2073-8994/15/11/2093)
Supplement: s1 [file s1]

**Table S1.** Table of Deep Excavation Project Case Studies.

| No. | The project name for the new construction project.                        | Location                             | Geological Zoning | Excavation stage | Wall thickness (cm) | Wall deep (m) | Final excavation depth (m) |
|-----|---------------------------------------------------------------------------|--------------------------------------|-------------------|------------------|---------------------|---------------|----------------------------|
| 1   | Phase 1 of Taishan Building                                               | Taishan District, New Taipei City.   | WL                | 4                | 60.0                | 22.5          | 11.90                      |
| 2   | The new residential and commercial building in Banqiao Xinban section.    | Banqiao District, New Taipei City.   | B2                | 7                | 100.0               | 35.0          | 20.00                      |
| 3   | The Chengpin Residential Building.                                        | Shilin District, Taipei City.        | TK3               | 4                | 50.0                | 19.0          | 9.30                       |
| 4   | The new building in Section B of Banqiao Heping.                          | Banqiao District, New Taipei City.   | C                 | 4                | 60.0                | 21.5          | 11.95                      |
| 5   | The new building in Section A of Banqiao Heping.                          | Banqiao District, New Taipei City.   | C                 | 4                | 60.0                | 21.0          | 11.95                      |
| 6   | The Jingshen construction project.                                        | Zhongshan District, Taipei City.     | T2                | 5                | 70.0                | 26.0          | 12.80                      |
| 7   | The new building in Section C of Banqiao Heping.                          | Banqiao District, New Taipei City.   | C                 | 4                | 60.0                | 21.0          | 11.95                      |
| 8   | The building in Section C of Sanchong Fugui.                              | Sanchong District, New Taipei City.  | SC                | 4                | 60.0                | 22.0          | 11.90                      |
| 9   | Starlight Art Gallery.                                                    | Sanchong District, New Taipei City.  | SC                | 7                | 80.0                | 36.0          | 16.10                      |
| 10  | Brownhenge Building.                                                      | Da'an District, Taipei City.         | TK2               | 5                | 60.0                | 24.0          | 11.95                      |
| 11  | Dongteng Qianli.                                                          | Zhongshan District, Taipei City.     | T2                | 6                | 80.0                | 32.0          | 16.00                      |
| 12  | The building in Guangming section of Xinzhuang.                           | Xinzhuang District, New Taipei City. | HC                | 4                | 60.0                | 22.0          | 11.95                      |
| 13  | The building in Section F of Sanchong Fugui.                              | Sanchong District, New Taipei City.  | SC                | 4                | 60.0                | 22.0          | 11.90                      |
| 14  | Da'an Road Residence.                                                     | Da'an District, Taipei City.         | TK2               | 5                | 70.0                | 27.5          | 13.95                      |
| 15  | The building located at land parcel number 782-1 in the Longfeng section. | Xinzhuang District, New Taipei City. | HC                | 5                | 70.0                | 29.0          | 14.95                      |
| 16  | Feiteng Liren.                                                            | Shilin District, Taipei City.        | TK3               | 5                | 50.0                | 20.0          | 10.85                      |
| 17  | Palm Island Residential Building.                                         | Neihu District, Taipei City.         | TK3               | 5                | 60.0                | 21.0          | 11.00                      |

**TableS2.** List of example data for network training and testing.

| No               | The project name for the new construction project.                     | The basic information of monitoring pipes. | No            | Project name.                                                             | Basic information of monitoring pipes. |
|------------------|------------------------------------------------------------------------|--------------------------------------------|---------------|---------------------------------------------------------------------------|----------------------------------------|
| Training Exapmle |                                                                        |                                            | 10            | Brownhenge Building.                                                      | SI-02-stage3                           |
| 1                | Phase 1 of Taishan Building                                            | SI-01-stage3                               | 10            | Same as above.                                                            | SI-02-stage4                           |
| 1                | Same as above.                                                         | SI-01-stage4                               | 10            | Same as above.                                                            | SI-02-stage5                           |
| 2                | The new residential and commercial building in Banqiao Xinban section. | SI-03-stage3                               | 11            | Dongteng Qianli.                                                          | SI-03-stage3                           |
| 2                | Same as above.                                                         | SI-03-stage4                               | 11            | Same as above.                                                            | SI-03-stage4                           |
| 2                | Same as above.                                                         | SI-03-stage5                               | 11            | Same as above.                                                            | SI-03-stage5                           |
| 2                | Same as above.                                                         | SI-03-stage6                               | 11            | Same as above.                                                            | SI-03-stage6                           |
| 2                | Same as above.                                                         | SI-03-stage7                               | 12            | The building in Guangming section of Xinzhuang.                           | SI-03-stage3                           |
| 3                | The Chengpin Residential Building.                                     | SI-01-stage3                               | 12            | Same as above.                                                            | SI-03-stage4                           |
| 3                | Same as above.                                                         | SI-01-stage4                               | 13            | The building in Section F of Sanchong Fugui.                              | SI-03-stage3                           |
| 4                | The new building in Section B of Banqiao Heping.                       | SI-01-stage3                               | 13            | Same as above.                                                            | SI-03-stage4                           |
| 4                | Same as above.                                                         | SI-01-stage4                               | 14            | Da'an Road Residence.                                                     | SI-01-stage3                           |
| 5                | The new building in Section A of Banqiao Heping.                       | SI-01-stage3                               | 14            | Same as above.                                                            | SI-01-stage4                           |
| 5                | Same as above.                                                         | SI-01-stage4                               | 14            | Same as above.                                                            | SI-01-stage5                           |
| 6                | The Jingshen construction project.                                     | SI-01-stage3                               | 15            | The building located at land parcel number 782-1 in the Longfeng section. | SI-01-stage3                           |
| 6                | Same as above.                                                         | SI-01-stage4                               | 15            | Same as above.                                                            | SI-01-stage4                           |
| 6                | Same as above.                                                         | SI-01-stage5                               | 15            | Same as above.                                                            | SI-01-stage5                           |
| 7                | The new building in Section C of Banqiao Heping.                       | SI-01-stage3                               | 16            | Feiteng Liren.                                                            | SI-01-stage3                           |
| 7                | Same as above.                                                         | SI-01-stage4                               | 16            | Same as above.                                                            | SI-01-stage4                           |
| 8                | The building in Section C of Sanchong Fugui.                           | SI-02-stage3                               | 16            | Same as above.                                                            | SI-01-stage5                           |
| 8                | Same as above.                                                         | SI-02-stage4                               | 17            | Palm Island Residential Building.                                         | SI-01-stage3                           |
| 9                | Starlight Art Gallery.                                                 | SI-04-stage3                               | 17            | Same as above.                                                            | SI-01-stage4                           |
| 9                | Same as above.                                                         | SI-04-stage4                               | 17            | Same as above.                                                            | SI-01-stage5                           |
| 9                | Same as above.                                                         | SI-04-stage5                               | Testing Range |                                                                           |                                        |
| 9                | Same as above.                                                         | SI-04-stage6                               | 10            | Brownhenge Building.                                                      | SI-04-stage3                           |
| 9                | Same as above.                                                         | SI-04-stage7                               | 10            | Same as above.                                                            | SI-04-stage4                           |
|                  |                                                                        |                                            | 10            | Same as above.                                                            | SI-04-stage5                           |
